# Supplementary material for: Excitation spectroscopic and synchronous fluorescence spectroscopic analysis of the origin of aggregation-induced emission in N,N-diphenyl-1-naphthylamine-o-carborane derivatives
Source: Royal Society of Chemistry journal article supplement (doi:10.1039/c8cp02603c), 2018-01-01
Supplement: c8cp02603c1.pdf [file c8cp02603c1.pdf]

## Excitation spectroscopic and synchronous fluorescence spectroscopic analysis of the origin of aggregation-induced emission in *N,N*-diphenyl-1-naphthylamine-*o*-carborane derivatives

So-Yoen Kim,<sup>a‡</sup> Jong-Dae Lee,<sup>b‡</sup> Yang-Jin Cho,<sup>a</sup> Mi Rang Son,<sup>a</sup> Ho-Jin Son,<sup>a</sup> Dae Won Cho<sup>\*ab</sup> and Sang Ook Kang<sup>\*a</sup>

<sup>a</sup> Department of Advanced Materials Chemistry, Korea University, Sejong, 30019, South Korea

<sup>b</sup> Department of Chemistry, College of Natural Sciences, Chosun University, Gwangju, 61452, South Korea.

<sup>c</sup> Center for Photovoltaic Materials, Korea University, Sejong, 30019, South Korea

<sup>‡</sup> These authors contributed equally to this work.

### Figure

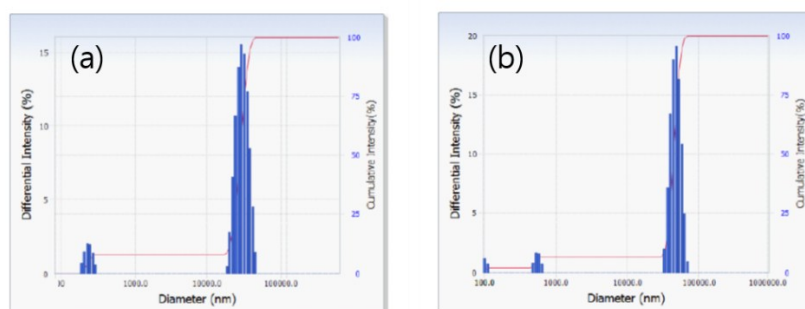

Fig. S1 DLS results of (a) **NpCbNp** (> 1 mM) and (b) **NpCb** (> 3 mM) in  $\text{CH}_2\text{Cl}_2$ .

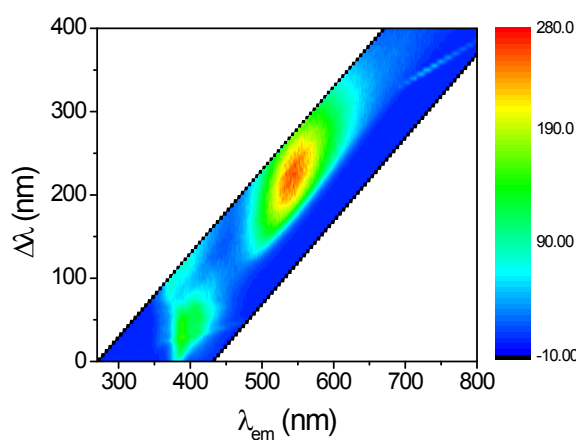

Fig. S2 Contour images of triad **NpCbNp** (ca. 50  $\mu\text{M}$ ) and the relationship between  $\Delta\lambda$  and emission ( $\lambda_{\text{em}}$ ) wavelengths, as measured in *n*-hexane.

**Table****Table S1.** Absorption maxima of **NpCb**, **NpCbNp** and **Na** measured in various solvents

| Solvent                         | $\lambda_{\text{abs}}$ (nm) |             |               |
|---------------------------------|-----------------------------|-------------|---------------|
|                                 | <b>Np</b>                   | <b>NpCb</b> | <b>NpCbNp</b> |
| <i>n</i> -hexane                | 290, 349                    | 310         | 312           |
| ethyl ether                     | 290, 346                    | 312         | 314           |
| THF                             | 291, 346                    | 314         | 316           |
| CH <sub>2</sub> Cl <sub>2</sub> | 292, 345                    | 315         | 317           |
| CH <sub>3</sub> CN              | 290, 341                    | 314         | 314           |
